# Supplementary material for: Enhanced Production of Bryonolic Acid in Trichosanthes cucumerina L. (Thai Cultivar) Cell Cultures by Elicitors and Their Biological Activities
Source: PubMed Central journal article supplement (PMC7356870; doi:10.3390/plants9060709), 2020-06-02
Supplement: plants-09-00709-s001.pdf [file plants-09-00709-s001.pdf]

Supplementary material

**Table 1.** The effect of explants from *T. cucumerina* L. in the induction of calli on MS medium supplemented with 0.5 mg/l IBA and 1 mg/l BA.

| Explants   | No. of Explants Cultures | Percent of Explant Forming Callus | Morphogenic Responsive of Explant |
|------------|--------------------------|-----------------------------------|-----------------------------------|
| Leaves     | 25                       | 100                               | Green, condensed callus           |
| Cotyledons | 25                       | 100                               | Green or white, condensed callus  |
| Hypocotyls | 25                       | 100                               | White, fragile callus             |
| Epicotyls  | 25                       | 100                               | White, fragile callus             |
| Roots      | 25                       | 0                                 | -                                 |

**Table 2.** Calibration data of cucurbitacin B and bryonolic acid, including linear regression equation, correlation coefficient ( $r^2$ ), the limit of quantitation (LOQ), and range.

| Compound       | Linear regression equation | $r^2$  | LOQ ( $\mu\text{g/ml}$ ) | Range ( $\mu\text{g/ml}$ ) |
|----------------|----------------------------|--------|--------------------------|----------------------------|
| Cucurbitacin B | $y = 0.0054x - 0.0024$     | 0.9990 | 22                       | 50-500                     |
| Bryonolic acid | $y = 0.0029x - 0.0075$     | 0.9975 | 35                       | 50-500                     |

**Table 3.** Intra-day and Inter-day precisions of HPLC method; results are reported on mean  $\pm$  standard deviation of % the relative standard deviation (%RSD).#

| Compound       | Intra-day       | Inter-day       |
|----------------|-----------------|-----------------|
| Cucurbitacin B | $5.04 \pm 1.13$ | $3.61 \pm 0.36$ |
| Bryonolic acid | $5.38 \pm 1.99$ | $4.14 \pm 0.50$ |

**Table 4.** Accuracy of HPLC method; results are based on %recovery.

| Compound       | Concentration ( $\mu\text{g/ml}$ ) | Found ( $\mu\text{g/ml}$ ) | %recovery         |
|----------------|------------------------------------|----------------------------|-------------------|
| Cucurbitacin B | Low (75)                           | $75.07 \pm 3.68$           | $100.09 \pm 4.91$ |
|                | Medium (125)                       | $119.12 \pm 7.42$          | $95.30 \pm 5.94$  |
|                | High (400)                         | $373.07 \pm 14.90$         | $93.27 \pm 3.72$  |
| Bryonolic acid | Low (75)                           | $75.55 \pm 4.82$           | $98.07 \pm 6.43$  |
|                | Medium (125)                       | $118.60 \pm 7.70$          | $94.88 \pm 6.16$  |
|                | High (400)                         | $373.47 \pm 11.50$         | $93.37 \pm 2.87$  |

**Table 5.** Averages of bryonolic acid contents from MeOH extracts of root, leaf, stem, loofah, cell suspension and callus. Results are reported as mean  $\pm$  standard deviation. (Linear regression equation of Cucurbitacin B and bryonolic acid:  $y = 0.0058x - 0.0734$  ( $r^2 = 0.9999$ ),  $y = 0.0027x + 0.1105$  ( $r^2 = 0.9881$ ), respectively).

| Sample                | Content (mg/g dry weight) |                  |
|-----------------------|---------------------------|------------------|
|                       | Cucurbitacin B            | Bryonolic acid   |
| Root (TC1)            | -                         | $2.47 \pm 0.58$  |
| Leaf (TC2)            | -                         | -                |
| Stem (TC3)            | -                         | -                |
| Loofah (TC4)          | $4.20 \pm 0.35$           | -                |
| Cell suspension (TC5) | -                         | $15.69 \pm 0.78$ |
| Callus (TC6)          | -                         | $24.65 \pm 1.97$ |

**Table 6.** Averages of bryonolic acid contents in MeOH extracts from TC cell suspension cultures after treated with elicitors including methyl jasmonate (50 – 200  $\mu$ M), chitosan (1 – 100 mg/ml), and yeast extract (0.1 – 2%) for 2, 4, 6, and 8 days compared with controls (70% ethanol, 1N acetic acid, and sterile water, respectively). Results are reported as mean  $\pm$  standard deviation. The asterisk indicates significance (\* $p$  < 0.05, \*\* $p$  < 0.01 compared with control group).

| Elicitors             | Concentration | Average of bryonolic acid content (mg/g dry weight) |                   |                                       |                                      |
|-----------------------|---------------|-----------------------------------------------------|-------------------|---------------------------------------|--------------------------------------|
|                       |               | Day2                                                | Day4              | Day6                                  | Day 8                                |
| Methyl Jasmonate (MJ) | Control       | 2.55 $\pm$ 0.19                                     | 8.62 $\pm$ 1.91   | 5.63 $\pm$ 1.44                       | 1.73 $\pm$ 0.68                      |
|                       | 50 $\mu$ M    | 8.03 $\pm$ 2.35 *                                   | 6.37 $\pm$ 3.01   | 8.17 $\pm$ 0.72 *                     | 8.38 $\pm$ 3.06 *                    |
|                       | 100 $\mu$ M   | 6.97 $\pm$ 5.42                                     | 7.80 $\pm$ 6.88   | 10.11 $\pm$ 10.24                     | 7.97 $\pm$ 5.21                      |
|                       | 200 $\mu$ M   | 9.74 $\pm$ 1.82 *                                   | 8.46 $\pm$ 0.26   | <b>10.33 <math>\pm</math> 1.27 **</b> | 8.18 $\pm$ 1.64 **                   |
| Chitosan (CH)         | Control       | 14.00 $\pm$ 1.74                                    | 10.96 $\pm$ 0.50  | 13.31 $\pm$ 1.33                      | 14.14 $\pm$ 4.00                     |
|                       | 1 mg/ml       | 19.16 $\pm$ 1.14 *                                  | 14.12 $\pm$ 4.59  | 16.69 $\pm$ 2.15                      | <b>23.56 <math>\pm</math> 1.68</b>   |
|                       | 50 mg/ml      | 6.72 $\pm$ 7.07                                     | 10.12 $\pm$ 10.21 | 11.28 $\pm$ 4.36                      | 12.49 $\pm$ 7.38                     |
|                       | 100 mg/ml     | 6.65 $\pm$ 1.17 **                                  | 9.69 $\pm$ 2.56   | 21.27 $\pm$ 11.23                     | 10.23 $\pm$ 0.74                     |
| Yeast extract (YE)    | Control       | 8.11 $\pm$ 6.14                                     | 8.10 $\pm$ 7.07   | 11.97 $\pm$ 1.84                      | 9.11 $\pm$ 3.58                      |
|                       | 0.1%          | 9.35 $\pm$ 2.05                                     | 10.28 $\pm$ 1.81  | 7.42 $\pm$ 1.58 *                     | <b>18.63 <math>\pm</math> 5.10 *</b> |
|                       | 0.5%          | 6.31 $\pm$ 2.66                                     | 5.07 $\pm$ 1.25   | 5.12 $\pm$ 0.50 *                     | 5.71 $\pm$ 1.47                      |
|                       | 2%            | 6.98 $\pm$ 3.51                                     | 6.34 $\pm$ 2.29   | 5.91 $\pm$ 1.71 **                    | 5.89 $\pm$ 1.69                      |

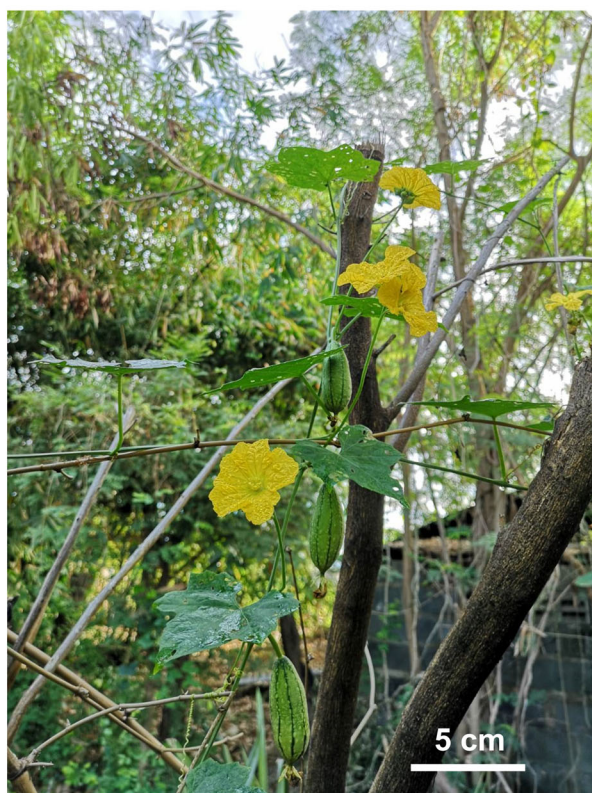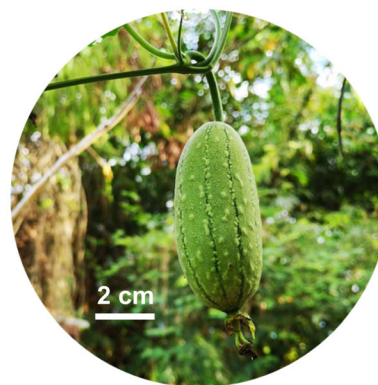

*Trichosanthes cucumerina* L.  
(Buapkhom)

**Figure S1.** *Trichosanthes cucumerina* L. (Buapkhom).

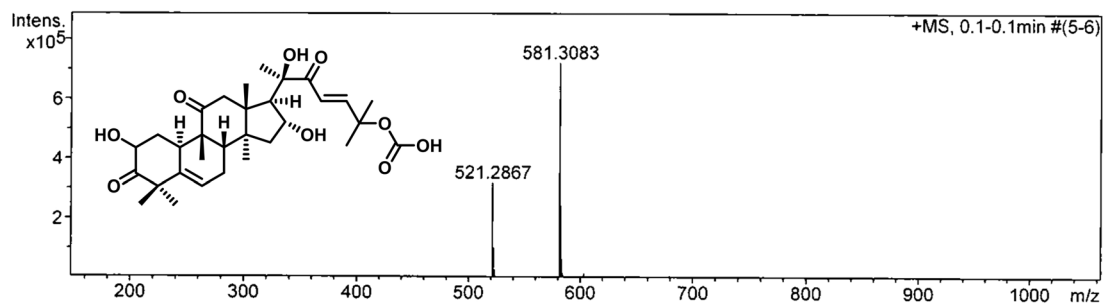

**Figure S2.** High-resolution ESI-MS of cucurbitacin B standard (m/z 581.3083).

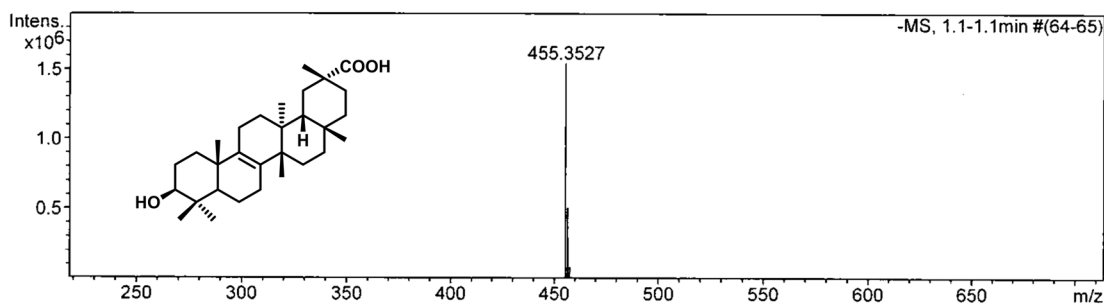

**Figure S3.** High resolution ESI-MS of bryonolic acid (m/z 455.3527).

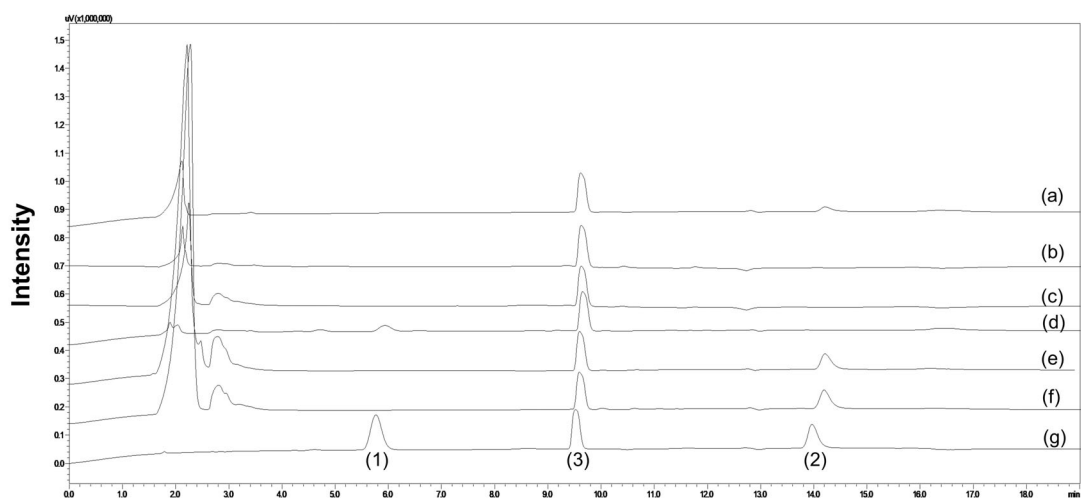

**Figure S4.** HPLC chromatogram of MeOH extracts (a) root (TC1), (b) leaf (TC2), (c) stem (TC3), (d) loofah (TC4), (e) cell suspension (TC5), and (f) callus (TC6) compared with two standards (g) as 250  $\mu\text{g/ml}$  of cucurbitacin B (1) and 250  $\mu\text{g/ml}$  of bryonolic acid (2). The extracts were detected at 210 nm and supplemented with 200  $\mu\text{g/ml}$  of progesterone (3) as an internal standard.
